# Supplementary material
Source: HighWire-hosted journal article supplement (https://hw-f5-jim.highwire.org/content/jim-2021-001885)
Supplement: inline-supplementary-material-1 [file inline-supplementary-material-1.pdf]

**Supplementary table 1** Baseline variables of rheumatoid arthritis patients.

|                                            | Total (n=108)     | Included patients (n=61) | Excluded patients (n=47) | <i>P</i> value |
|--------------------------------------------|-------------------|--------------------------|--------------------------|----------------|
| Age, mean $\pm$ SD (years)                 | 57.79 $\pm$ 12.81 | 57.51 $\pm$ 12.02        | 58.15 $\pm$ 13.89        | 0.798          |
| Women, no. (%)                             | 86 (80)           | 50 (82)                  | 36 (77)                  | 0.492          |
| Disease duration (years),<br>mean $\pm$ SD | 6.91 $\pm$ 5.84   | 6.50 $\pm$ 5.37          | 7.44 $\pm$ 6.42          | 0.411          |
| ESR (mm/h), mean $\pm$ SD                  | 45.42 $\pm$ 30.59 | 45.84 $\pm$ 32.16        | 44.87 $\pm$ 28.76        | 0.872          |
| CRP (mg/dl), mean $\pm$ SD                 | 29.44 $\pm$ 33.95 | 30.67 $\pm$ 35.49        | 27.84 $\pm$ 32.15        | 0.669          |
| RF positive, no. (%)                       | 81 (75)           | 45(74)                   | 36 (77)                  | 0.737          |
| ACCP positive, no. (%)                     | 81 (75)           | 45(74)                   | 36 (77)                  | 0.737          |
| DAS28, mean $\pm$ SD                       | 5.55 $\pm$ 1.75   | 5.51 $\pm$ 1.91          | 5.60 $\pm$ 1.53          | 0.795          |
| Treatments                                 |                   |                          |                          |                |
| bDMARDs, no. (%)                           | 28(26)            | 15 (25)                  | 13 (28)                  | 0.718          |
| cDMARDs, no. (%)                           | 91 (84)           | 51 (84)                  | 40 (85)                  | 0.832          |
| NSAIDs, no. (%)                            | 33 (31)           | 17 (28)                  | 16 (34)                  | 0.490          |
| Corticosteroids                            | 36 (33)           | 19 (31)                  | 17 (36)                  | 0.583          |

ESR, Erythrocyte sedimentation rate; CRP, C-reactive protein; RF, Rheumatoid factor; ACCP, Anti-cyclic citrullinated peptide; DAS28, Disease activity score of 28 joints; cDMARDs, conventional disease-modifying antirheumatic drugs; bDMARDs, biologic disease-modifying antirheumatic drugs; NSAIDs, nonsteroid anti-inflammatory drugs.

There was no significant difference in age, gender, duration of disease, ESR, CRP, DAS28, RF positive rate, ACCP positive rate and treatments between the included patients and excluded patients.
